# Supplementary material
Source: ML conference proceedings conference paper supplement (https://openreview.net/forum?id=06JRFVK88O)

```
In [ ]: import os
import math
import numpy as np
import pandas as pd
import plotly.io as pio
import plotly.express as px
import plotly.graph_objects as go
from plotly.subplots import make_subplots
from tensorboard.backend.event_processing import event_accumulator
pio.kaleido.scope.mathjax = None

In [ ]: colors = px.colors.qualitative.Plotly
print("colors:", colors)

colors: ['#636EFA', '#EF553B', '#00CC96', '#AB63FA', '#FFA15A', '#19D3F3', '#FF6692', '#B6E880', '#FF97FF', '#FECB52']

In [ ]: LOG_DIR = "logs"
COLOR_MAPS = {
    "IMAXPPO": colors[1],
    "SupMAPPO": colors[3],
    "GAILMAPPO": colors[0],
    "MAPPO": colors[5],
    "IPPO": colors[8],
    "QMIX": "#feb406",
    "QPLEX": colors[2],
}
ALGOS = ["MAPPO", "IPPO", "QMIX", "QPLEX", "SupMAPPO", "GAILMAPPO", "IMAXPPO"]
ALGO_NAMES = ["MAPPO", "IPPO", "QMIX", "QPLEX", "SupMAPPO", "IMAX-PPO (GAIL)", "IMAX-PPO (InQ)"]

In [ ]: def read_tensorboard_events(folder):
    logs = []
    for file in os.listdir(folder):
        if "events" in file:
            event = event_accumulator.EventAccumulator(os.path.join(folder, file))
            event.Reload()
            tag = "game_eval/winrate"
            if tag not in event.scalars.Keys():
                tag = "game/winrate"
            logs += [(x.step, x.value) for x in event.Scalars(tag)]
    logs.sort(key=lambda x: x[0])
    return logs

In [ ]: def smooth(scalars, weight):
    last = 0
    smoothed = []
    for num_acc, next_val in enumerate(scalars):
        last = last * weight + (1 - weight) * next_val
        smoothed.append(last / (1 - math.pow(weight, num_acc+1)))
    return smoothed

In [ ]: def read_logs(ts_factor=0.9):
    inputs = []
    for algo in ALGOS:
        for env_name in os.listdir(f"{LOG_DIR}/{algo}"):
            inputs.append((algo, env_name))
    inputs.sort(key=lambda x: ALGOS.index(x[0]))
    data = {}
    for algo, env_name in inputs:
        steps, winrates = zip(*read_tensorboard_events(f"{LOG_DIR}/{algo}/{env_name}"))
        smooth_winrates = smooth(winrates, ts_factor)
        if env_name not in data:
            data[env_name] = {}
        data[env_name][algo] = (steps, winrates, smooth_winrates)
    return data
data = read_logs()

In [ ]: data_df = pd.DataFrame.from_dict(data)
data_df.to_pickle("saved_results/pickle_series.pkl")
mean_df = data_df.map(lambda x: np.mean(x[-1][-32:])) if isinstance(x, tuple) else 0)
def show_senarios(name):
    df = mean_df.filter(regex=name).copy()
    names = df.columns.tolist()
    names.sort(key=lambda x: x.replace("5_vs_5", "05_vs_05").replace("hard", "xhard"))
    df = df[names].loc[ALGOS]
    df = df.rename(index={algo: name for algo, name in zip(ALGOS, ALGO_NAMES)})
    df["Average"] = df.mean(axis=1)
    df = df.map(lambda x: f"{100*x:.1f}%")
    df = df.transpose()
    display(df)
show_senarios("protoss")
show_senarios("terran")
show_senarios("zerg")
show_senarios("miner")
show_senarios("academy")
```

|                  | MAPPO | IPPO  | QMIX  | QPLEX | SupMAPPO | IMAX-PPO (GAIL) | IMAX-PPO (InQ) |
|------------------|-------|-------|-------|-------|----------|-----------------|----------------|
| protoss_5_vs_5   | 58.0% | 54.6% | 70.2% | 53.3% | 71.8%    | 68.1%           | 78.7%          |
| protoss_10_vs_10 | 58.3% | 58.0% | 69.0% | 53.7% | 67.3%    | 59.6%           | 79.8%          |
| protoss_10_vs_11 | 18.2% | 20.3% | 42.5% | 22.8% | 36.7%    | 21.3%           | 48.7%          |
| protoss_20_vs_20 | 38.1% | 44.5% | 69.7% | 27.2% | 71.1%    | 76.3%           | 80.6%          |
| protoss_20_vs_23 | 5.1%  | 4.1%  | 16.5% | 4.8%  | 21.9%    | 11.8%           | 24.2%          |
| Average          | 35.5% | 36.3% | 53.6% | 32.3% | 53.7%    | 47.4%           | 62.4%          |

|                        | MAPPO | IPPO  | QMIX  | QPLEX | SupMAPPO | IMAX-PPO (GAIL) | IMAX-PPO (InQ) |
|------------------------|-------|-------|-------|-------|----------|-----------------|----------------|
| <b>terran_5_vs_5</b>   | 52.0% | 56.2% | 58.4% | 70.0% | 55.8%    | 53.3%           | 69.9%          |
| <b>terran_10_vs_10</b> | 58.1% | 57.3% | 65.8% | 66.1% | 54.1%    | 58.4%           | 72.2%          |
| <b>terran_10_vs_11</b> | 28.6% | 31.0% | 39.4% | 41.4% | 26.9%    | 28.4%           | 53.9%          |
| <b>terran_20_vs_20</b> | 52.8% | 49.6% | 57.6% | 23.9% | 38.6%    | 35.9%           | 65.4%          |
| <b>terran_20_vs_23</b> | 11.2% | 10.0% | 10.0% | 7.0%  | 11.2%    | 4.7%            | 17.7%          |
| <b>Average</b>         | 40.5% | 40.8% | 46.2% | 41.7% | 37.3%    | 36.1%           | 55.8%          |

|                      | MAPPO | IPPO  | QMIX  | QPLEX | SupMAPPO | IMAX-PPO (GAIL) | IMAX-PPO (InQ) |
|----------------------|-------|-------|-------|-------|----------|-----------------|----------------|
| <b>zerg_5_vs_5</b>   | 41.0% | 37.2% | 37.2% | 47.8% | 52.5%    | 48.6%           | 55.0%          |
| <b>zerg_10_vs_10</b> | 39.1% | 49.4% | 40.8% | 41.6% | 57.4%    | 50.6%           | 57.6%          |
| <b>zerg_10_vs_11</b> | 31.2% | 26.0% | 28.0% | 31.1% | 38.1%    | 34.8%           | 41.5%          |
| <b>zerg_20_vs_20</b> | 31.9% | 31.2% | 30.4% | 15.8% | 44.3%    | 26.7%           | 43.3%          |
| <b>zerg_20_vs_23</b> | 15.8% | 8.3%  | 10.1% | 6.7%  | 13.6%    | 8.2%            | 21.3%          |
| <b>Average</b>       | 31.8% | 30.4% | 29.3% | 28.6% | 41.2%    | 33.8%           | 43.7%          |

|                            | MAPPO | IPPO  | QMIX  | QPLEX | SupMAPPO | IMAX-PPO (GAIL) | IMAX-PPO (InQ) |
|----------------------------|-------|-------|-------|-------|----------|-----------------|----------------|
| <b>miner_easy_2_vs_2</b>   | 48.9% | 49.3% | 57.2% | 59.8% | 47.1%    | 54.5%           | 61.8%          |
| <b>miner_medium_2_vs_2</b> | 40.6% | 39.5% | 47.3% | 50.4% | 39.4%    | 39.3%           | 55.0%          |
| <b>miner_hard_2_vs_2</b>   | 31.2% | 31.2% | 41.7% | 43.5% | 31.3%    | 29.7%           | 49.8%          |
| <b>Average</b>             | 40.2% | 40.0% | 48.7% | 51.2% | 39.2%    | 41.2%           | 55.5%          |

|                                   | MAPPO | IPPO  | QMIX  | QPLEX | SupMAPPO | IMAX-PPO (GAIL) | IMAX-PPO (InQ) |
|-----------------------------------|-------|-------|-------|-------|----------|-----------------|----------------|
| <b>academy_3_vs_1_with_keeper</b> | 88.0% | 82.7% | 8.1%  | 90.2% | 96.1%    | 96.4%           | 98.1%          |
| <b>academy_counterattack_easy</b> | 87.8% | 84.1% | 16.0% | 94.9% | 89.7%    | 64.1%           | 95.0%          |
| <b>academy_counterattack_hard</b> | 77.4% | 70.9% | 3.2%  | 95.1% | 10.7%    | 15.2%           | 97.3%          |
| <b>Average</b>                    | 84.4% | 79.2% | 9.1%  | 93.4% | 65.5%    | 58.6%           | 96.8%          |

```
In [ ]: def create_baseline_fig(data, showlegend_dict, min_x=1e4, max_x=10e6, min_y=1e-3, max_y=0.95, dtick_x=5e6, dtick_y=0.4, line_width=1.6, dash="solid"):
    fig = go.Figure()
    for algo in ALGOS:
        if algo not in data:
            continue
        steps, winrates, _ = data[algo]
        fig.add_trace(go.Scatter(x=steps, y=winrates, mode='lines', showlegend=False, line_color=COLOR_MAPS[algo], opacity=0.1, line_width=1))
    for algo, name in zip(ALGOS, ALGO_NAMES):
        if algo not in data:
            continue
        steps, _, smooth_winrates = data[algo]
        showlegend = showlegend_dict.get(algo, True)
        showlegend_dict[algo] = False
        dash = "solid" if len(smooth_winrates) > 20 else dash
        fig.add_trace(go.Scatter(
            x=steps, y=smooth_winrates, mode='lines', showlegend=showlegend, name=name,
            line_color=COLOR_MAPS[algo], line_width=line_width,
            line_dash=dash
        ))
    fig.update_layout(template='simple_white', margin=dict(l=0, r=0, t=0, b=0, pad=0, autoexpand=True))
    fig.update_layout(height=140, width=220)
    if min_x is not None:
        fig.update_xaxes(range=[min_x, max_x], dtick=dtick_x, minor=dict(ticklen=2))
    if min_y is not None:
        fig.update_yaxes(range=[min_y, max_y], dtick=dtick_y, minor=dict(ticklen=3, nticks=2))
    fig.update_layout(showlegend=False)
    return fig
```

```
In [ ]: plotly_figs, showlegend_dict = {}, {}
for env_name in sorted(data.keys()):
    if any(x in env_name for x in ["protoss", "terran", "zerg"]):
        plotly_figs[env_name] = create_baseline_fig(data[env_name], showlegend_dict, max_y=0.86, dtick_y=0.2)
```

```
In [ ]: env_names = [env_name for env_name in plotly_figs if any(x in env_name for x in ["protoss", "terran", "zerg"])]
env_names.sort(key=lambda x: x.replace("5_vs_5", "05_vs_05"))
os.makedirs("graphs", exist_ok=True)
fig = make_subplots(rows=3, cols=5, horizontal_spacing=0.06, vertical_spacing=0.2)
for i, env_name in enumerate(env_names):
    plotly_fig = plotly_figs[env_name]
    plotly_fig.write_image(f"graphs/{env_name}.pdf")
    fig.add_traces(plotly_fig.data, rows=i//5+1, cols=i%5+1)
    fig['layout'][f'xaxis{i+1}'].update(title=env_name)
    fig['layout'][f'yaxis{i+1}'].update(showticklabels=i%5==0)
fig.update_layout(template='simple_white', margin=dict(l=4, r=4, t=4, b=4, pad=4, autoexpand=True))
fig.update_layout(height=200*3, width=180*6)
fig.update_xaxes(dtick=5e6, minor=dict(ticklen=2))
fig.update_yaxes(range=[1e-3, 0.95], dtick=0.4, minor=dict(ticklen=3, nticks=2))
fig.update_layout(legend=dict(orientation="h", yanchor="bottom", y=1.02, xanchor="right", x=1))
fig.update_layout(autosize=False)
fig.show("svg")
fig.update_layout(height=500, width=1000)
fig.update_layout(legend=dict(orientation="h", yanchor="bottom", y=1.02, xanchor="right", x=1))
fig.write_image(f"graphs/legend.pdf")
```

MAPPO IPPO QMIX QPLEX SupMAPPO IMAX-PPO (GAIL) IMAX-PPO (InQ)

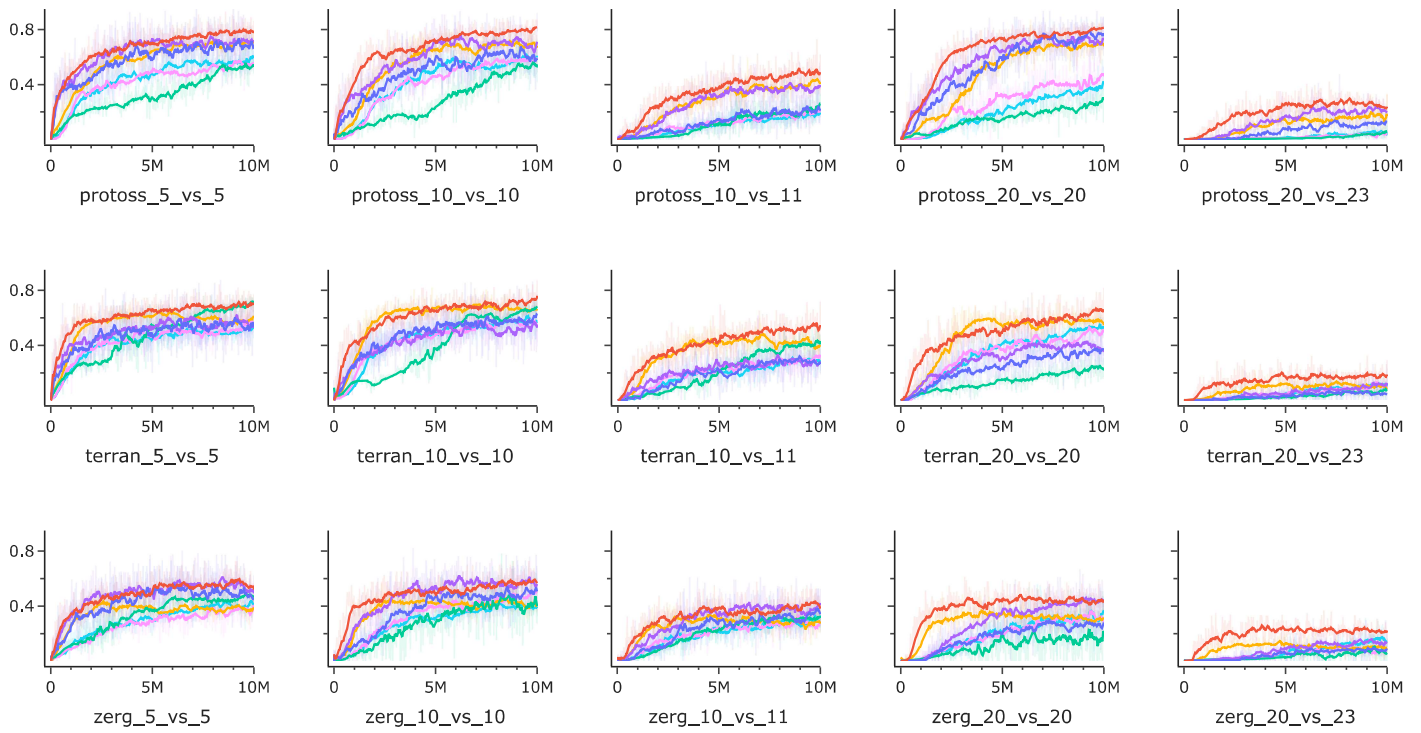

```
In [ ]: plotly_figs, showlegend_dict = {}, {}
for env_name in sorted(data.keys()):
    if "miner" in env_name:
        plotly_figs[env_name] = create_baseline_fig(data[env_name], showlegend_dict, max_x=2e6, max_y=0.69, min_y=0.01, dtick_x=1e6, dtick_y=0.2)
```

```
In [ ]: env_names = [env_name for env_name in plotly_figs if "miner" in env_name]
print("env_names:", env_names)
env_names.sort(key=lambda x: x.replace("hard", "xhard"))
os.makedirs("graphs", exist_ok=True)
fig = make_subplots(rows=1, cols=5, horizontal_spacing=0.06, vertical_spacing=0.2)
for i, env_name in enumerate(env_names):
    plotly_fig = plotly_figs[env_name]
    plotly_fig.write_image(f"graphs/{env_name}.pdf")
    fig.add_traces(plotly_fig.data, rows=i//5+1, cols=i%5+1)
    fig['layout'][f'xaxis{i+1}'].update(title=env_name)
    fig['layout'][f'yaxis{i+1}'].update(showticklabels=i%5==0)
fig.update_layout(template='simple_white', margin=dict(l=4, r=4, t=4, b=4, pad=4, autoexpand=True))
fig.update_layout(height=200, width=180*6)
fig.update_xaxes(dtick=1e6, minor=dict(ticklen=3, nticks=2))
fig.update_yaxes(range=[0.01, 0.74], dtick=0.2, minor=dict(ticklen=3, nticks=1))
fig.update_layout(legend=dict(orientation="h", yanchor="bottom", y=1.02, xanchor="right", x=1))
fig.update_layout(autosize=False)
fig.show("svg")
```

env\_names: ['miner\_easy\_2\_vs\_2', 'miner\_hard\_2\_vs\_2', 'miner\_medium\_2\_vs\_2']

MAPPO IPPO QMIX QPLEX SupMAPPO IMAX-PPO (GAIL) IMAX-PPO (InQ)

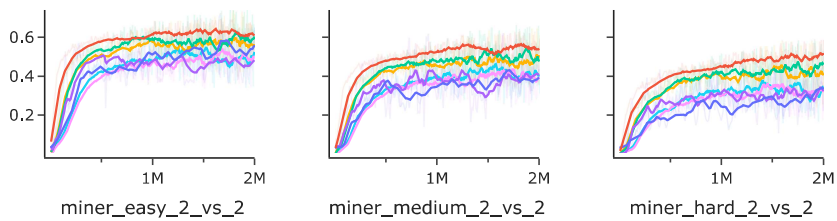

```
In [ ]: plotly_figs, showlegend_dict = {}, {}
for env_name in sorted(data.keys()):
    if "academy" in env_name:
        plotly_figs[env_name] = create_baseline_fig(data[env_name], showlegend_dict, max_x=5e5, dtick_x=2e5, max_y=1.1, dtick_y=0.5, dash="dash")
```

```
In [ ]: env_names = [env_name for env_name in plotly_figs if "academy" in env_name]
print("env_names:", env_names)
env_names.sort(key=lambda x: x.replace("hard", "xhard"))
os.makedirs("graphs", exist_ok=True)
fig = make_subplots(rows=1, cols=5, horizontal_spacing=0.06, vertical_spacing=0.2)
for i, env_name in enumerate(env_names):
    plotly_fig = plotly_figs[env_name]
    plotly_fig.write_image(f"graphs/{env_name}.pdf")
    fig.add_traces(plotly_fig.data, rows=i//5+1, cols=i%5+1)
    fig['layout'][f'xaxis{i+1}'].update(title=env_name)
    fig['layout'][f'yaxis{i+1}'].update(showticklabels=i%5==0)
fig.update_layout(template='simple_white', margin=dict(l=4, r=4, t=4, b=4, pad=4, autoexpand=True))
fig.update_layout(height=200, width=180*6)
fig.update_xaxes(range=[1e2, 5e5], dtick=2e5, minor=dict(ticklen=3, nticks=2))
fig.update_yaxes(range=[0.5, 1.1], dtick=0.5, minor=dict(ticklen=3, nticks=1))
fig.update_layout(legend=dict(orientation="h", yanchor="bottom", y=1.02, xanchor="right", x=1))
fig.update_layout(autosize=False)
fig.show("svg")
fig.update_layout(height=500, width=1000)
fig.update_layout(legend=dict(orientation="h", yanchor="bottom", y=1.02, xanchor="right", x=1))
fig.write_image(f"graphs/legend_grf.pdf")
```

env\_names: ['academy\_3\_vs\_1\_with\_keeper', 'academy\_counterattack\_easy', 'academy\_counterattack\_hard']

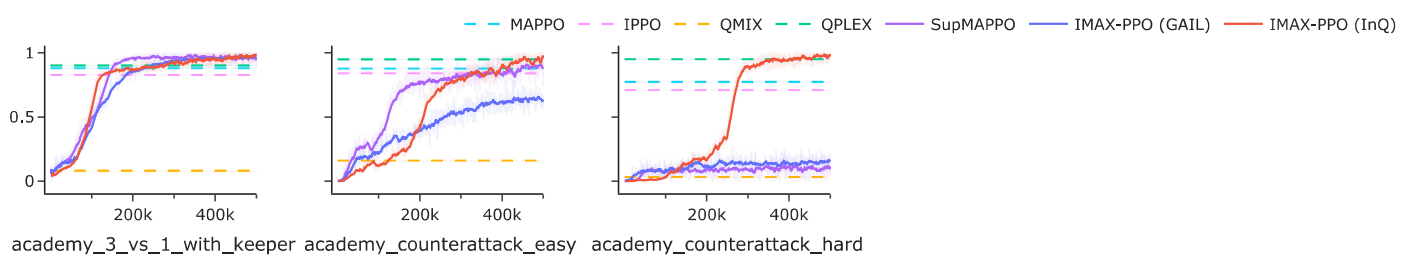

Supplement: supplementary_material [file attachment]
