# Supplementary material
Source: ML conference proceedings conference paper supplement (https://openreview.net/forum?id=06JRFVK88O)

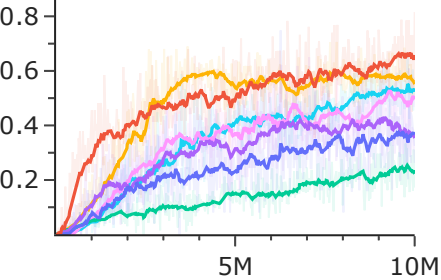

Supplement: supplementary_material [file attachment]

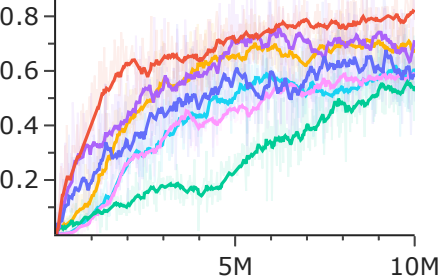

Supplement: supplementary_material [file attachment]

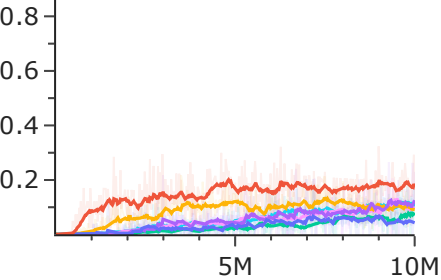

Supplement: supplementary_material [file attachment]

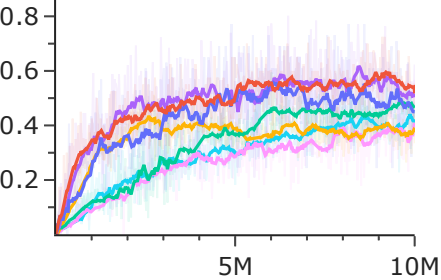

Supplement: supplementary_material [file attachment]

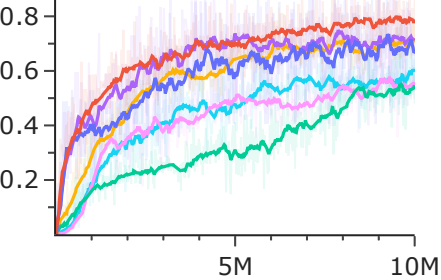

Supplement: supplementary_material [file attachment]

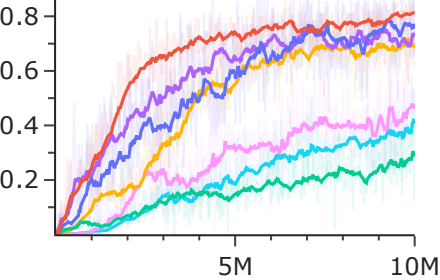

Supplement: supplementary_material [file attachment]

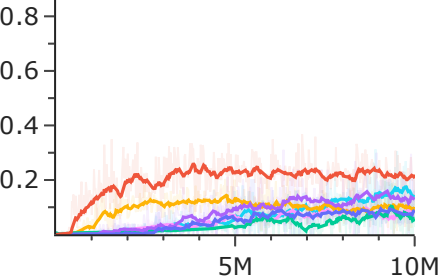

Supplement: supplementary_material [file attachment]

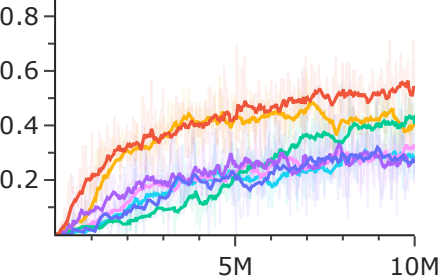

Supplement: supplementary_material [file attachment]

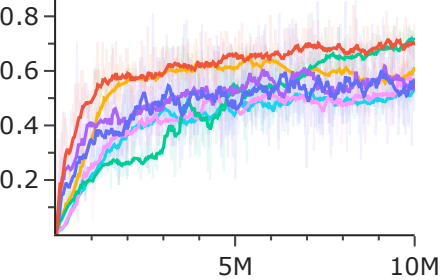

Supplement: supplementary_material [file attachment]

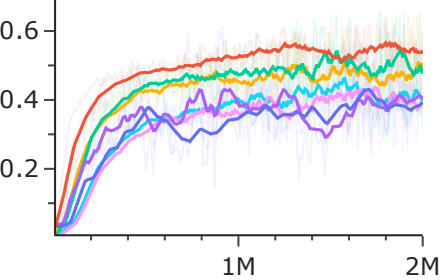

Supplement: supplementary_material [file attachment]

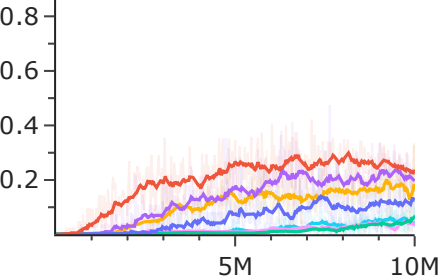

Supplement: supplementary_material [file attachment]

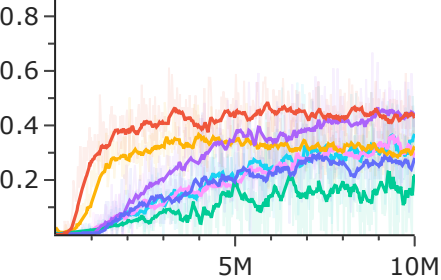

Supplement: supplementary_material [file attachment]

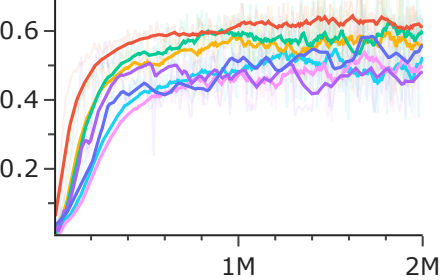

Supplement: supplementary_material [file attachment]

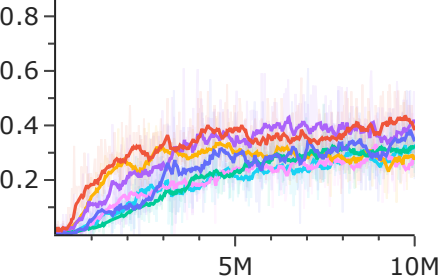

Supplement: supplementary_material [file attachment]

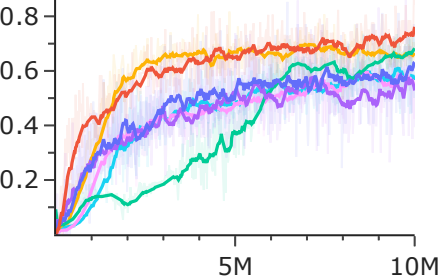

Supplement: supplementary_material [file attachment]

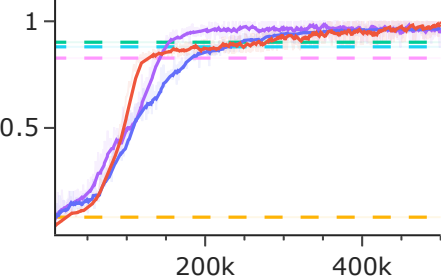

Supplement: supplementary_material [file attachment]

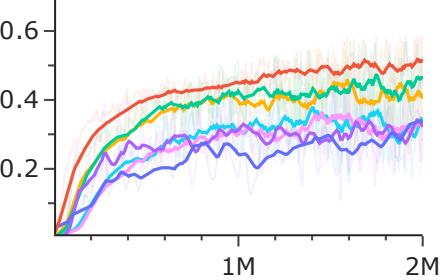

Supplement: supplementary_material [file attachment]

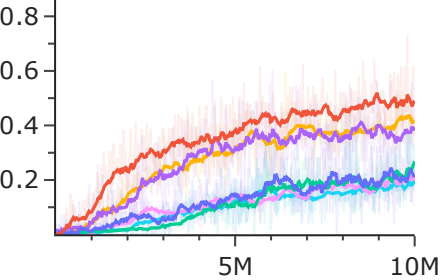

Supplement: supplementary_material [file attachment]

MAPPO IPPO QMIX QPLEX SupMAPPO IMAX-PPO (GAIL) IMAX-PPO (InQ)

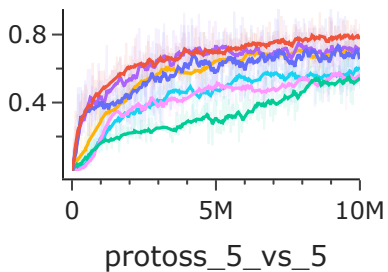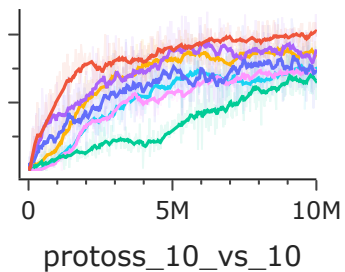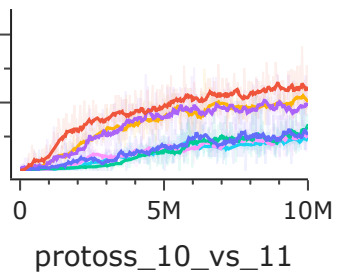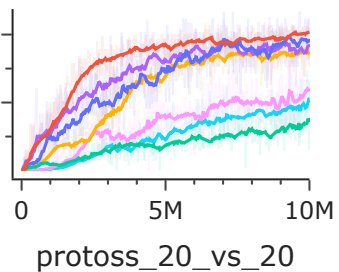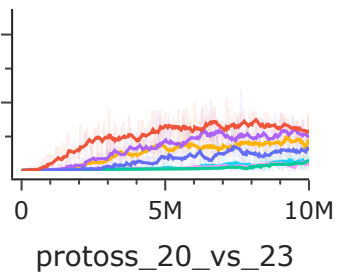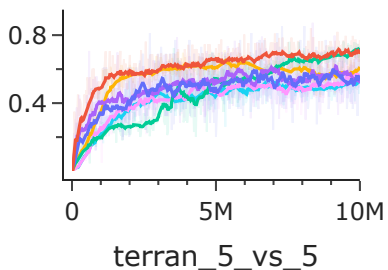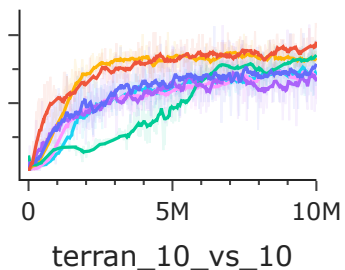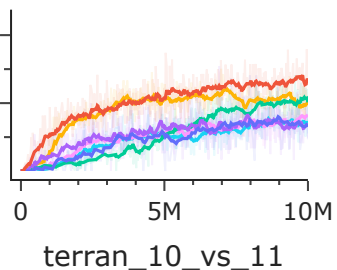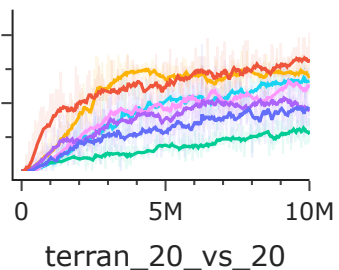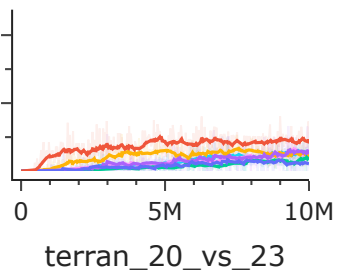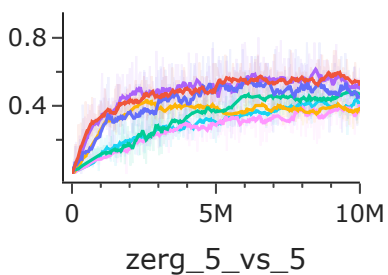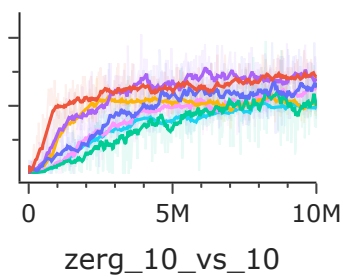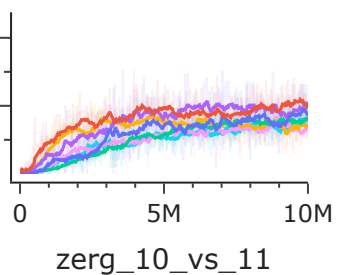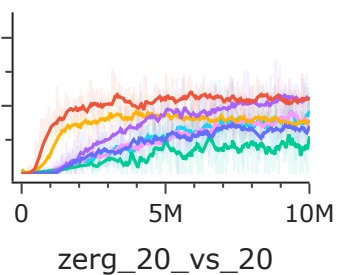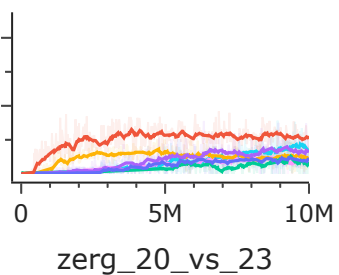

Supplement: supplementary_material [file attachment]

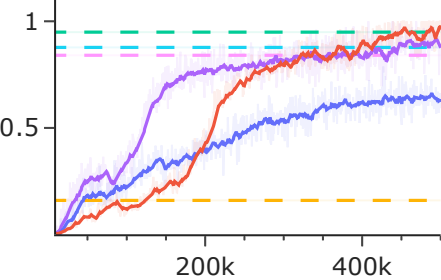

Supplement: supplementary_material [file attachment]

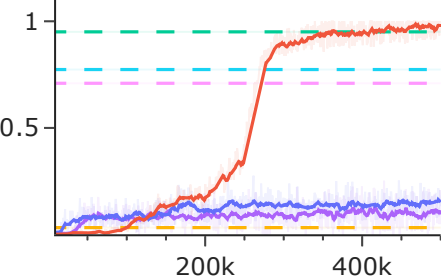

Supplement: supplementary_material [file attachment]

MAPPO IPPO QMIX QPLEX SupMAPPO IMAX-PPO (GAIL) IMAX-PPO (InQ)

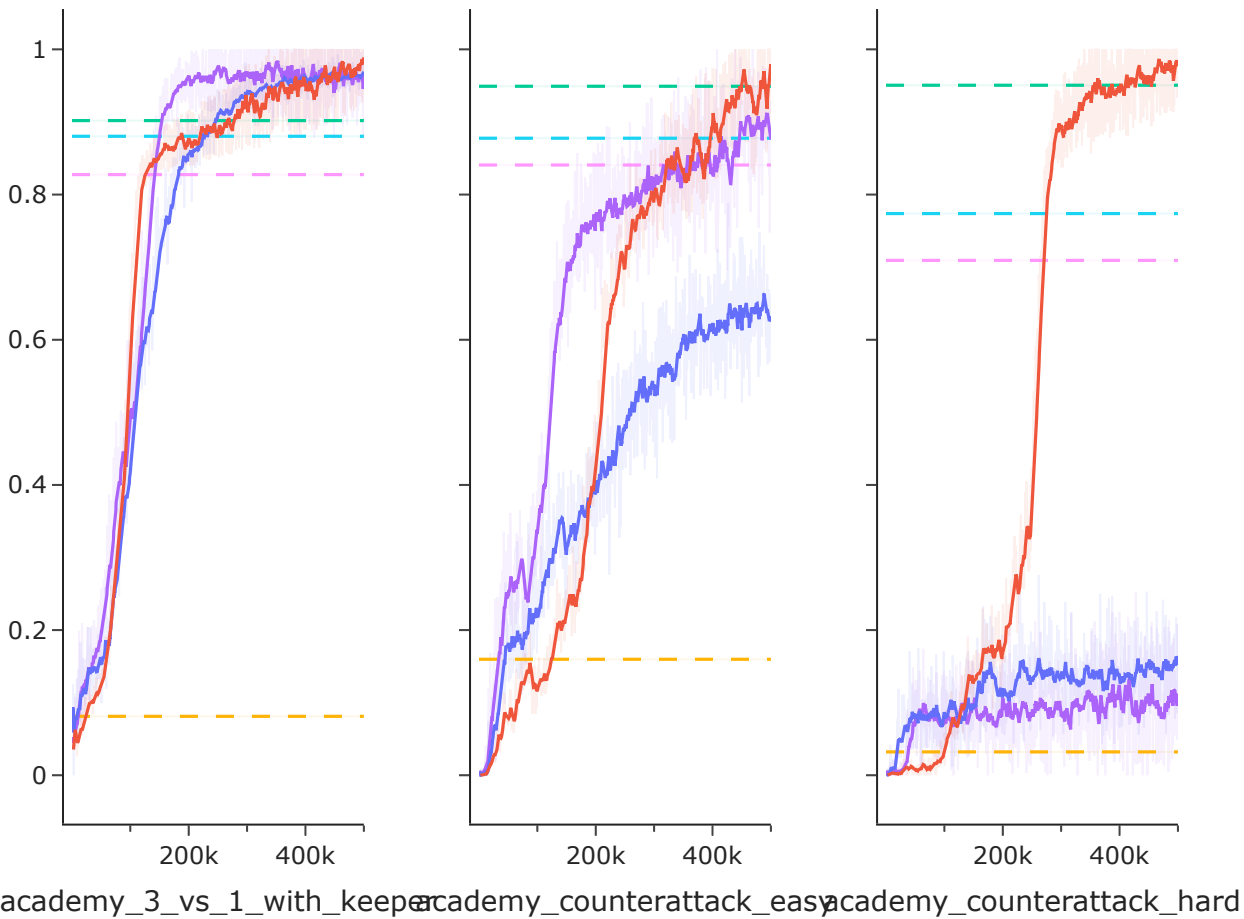

Supplement: supplementary_material [file attachment]

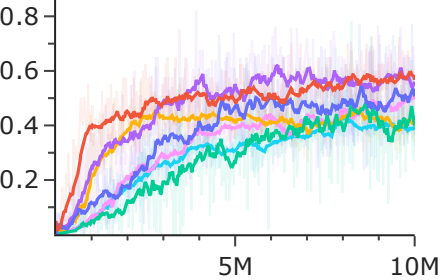

Supplement: supplementary_material [file attachment]
